# Supplementary material for: High electron transfer of TiO2nanorod@carbon layer supported flower-like WS2nanosheets for triiodide electrocatalytic reduction
Source: Royal Society of Chemistry journal article supplement (doi:10.1039/d0nj06230h), 2021-01-01
Supplement: d0nj06230h1.pdf [file d0nj06230h1.pdf]

## Supporting Information

### **High electron transfer of TiO<sub>2</sub> nanorods@carbon layers supported flower-like WS<sub>2</sub> nanosheets for triiodide electrocatalytic reduction**

Wei Wang<sup>1,4,\*,+</sup>, Tianyu Liu<sup>1,+</sup>, Chuan Ding<sup>1</sup>, Min Wang<sup>1</sup>, Jirong Bai<sup>1</sup>, Jintao Zhang<sup>1</sup>,  
Hengchang Bi<sup>3,\*</sup>, Yueming Sun<sup>2</sup>, Yuqiao Wang<sup>2,\*</sup>

<sup>1</sup> School of Chemical Engineering and Materials, Changzhou Institute of Technology, Changzhou 213032, P.R. China,

<sup>2</sup> Institute of Advanced Materials, School of Chemistry and Chemical Engineering, Southeast University, Nanjing 211189, P.R. China,

<sup>3</sup> Shanghai Key Laboratory of Multidimensional Information Processing, School of Communication and Electronic Engineering, East China Normal University, Shanghai 200241, P.R. China,

<sup>4</sup> Center for Programmable Materials, School of Materials Science and Engineering, Nanyang Technological University, 50 Nanyang Avenue, Singapore 639798, Singapore.

<sup>+</sup> These authors contributed equally to this work.

<sup>\*</sup> Corresponding author (E-mail addresses: mse\_wwang@ntu.edu.sg (Wei Wang), hcbi@cee.ecnu.edu.cn (Hengchang Bi), yqwang@seu.edu.cn (Yuqiao Wang))

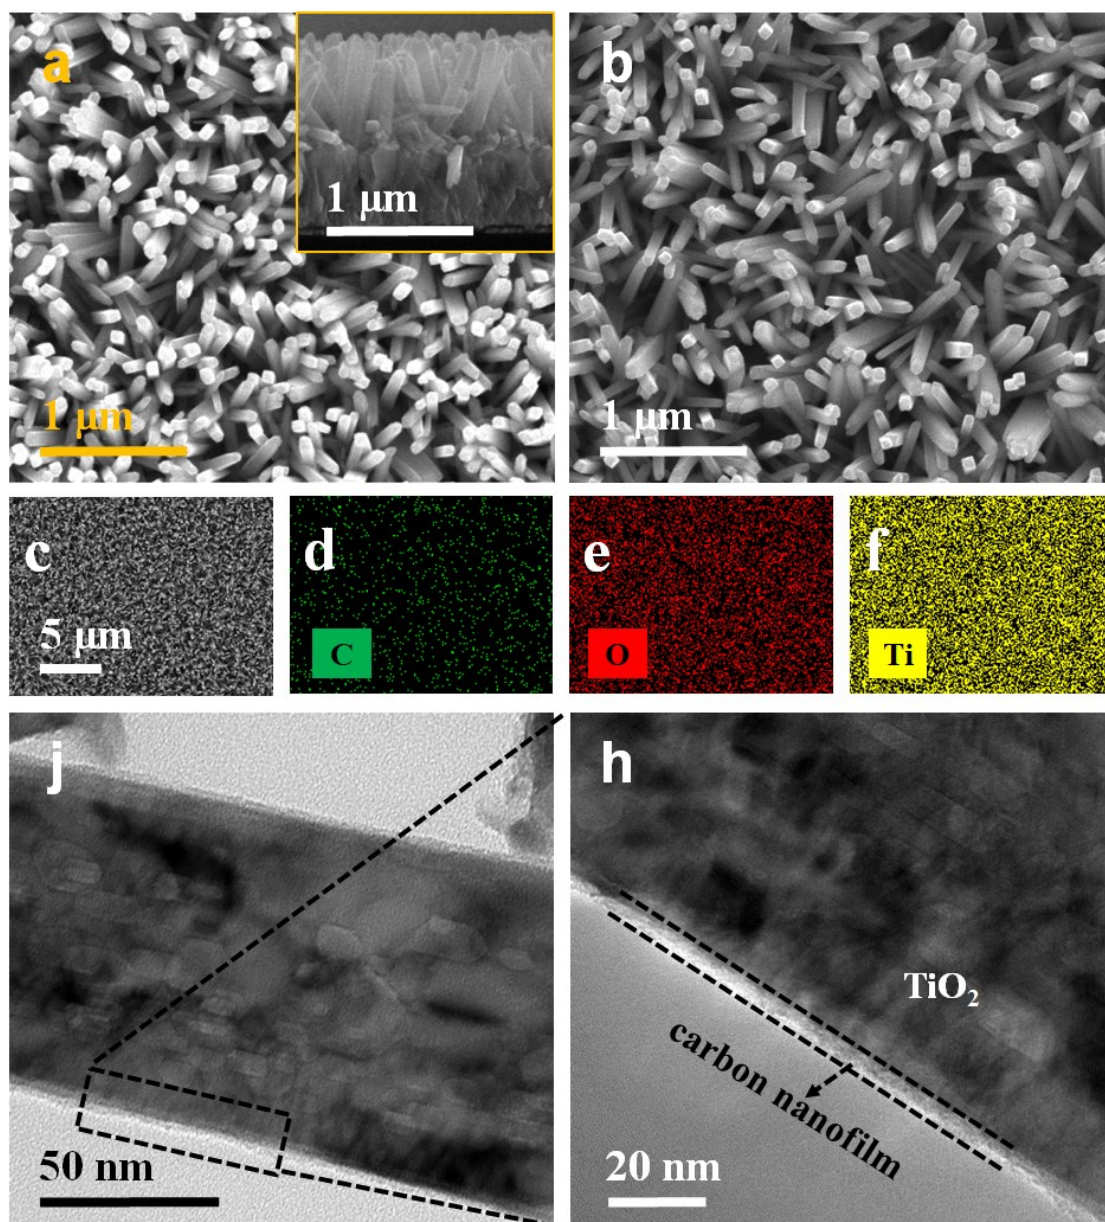

**Figure S1.** (a) SEM images of the TNRs (Inset: the cross-sectional view image). (b) SEM image of the TNRs@C. (c): STEM image and EDS elemental mapping of (d) carbon, (e) oxygen and (f) titanium elements in TNRs@C. (j) TEM image of TNRs@C. (h) HR-TEM image of TNRs@C.

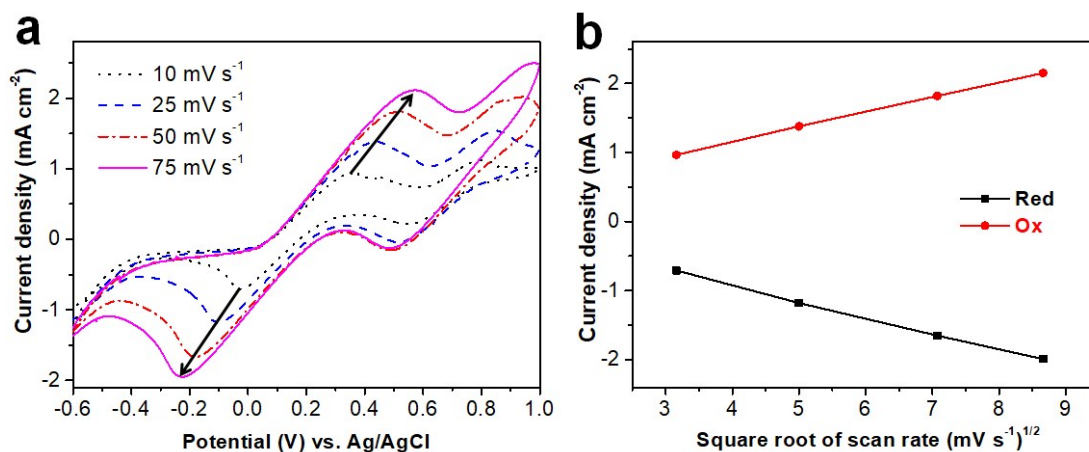

**Figure S2.** (a) CV curves of TNRs@C@WS<sub>2</sub> at various scan rates. (b) Relationship between square root of scan rate and peak current densities of TNRs@C@WS<sub>2</sub>.

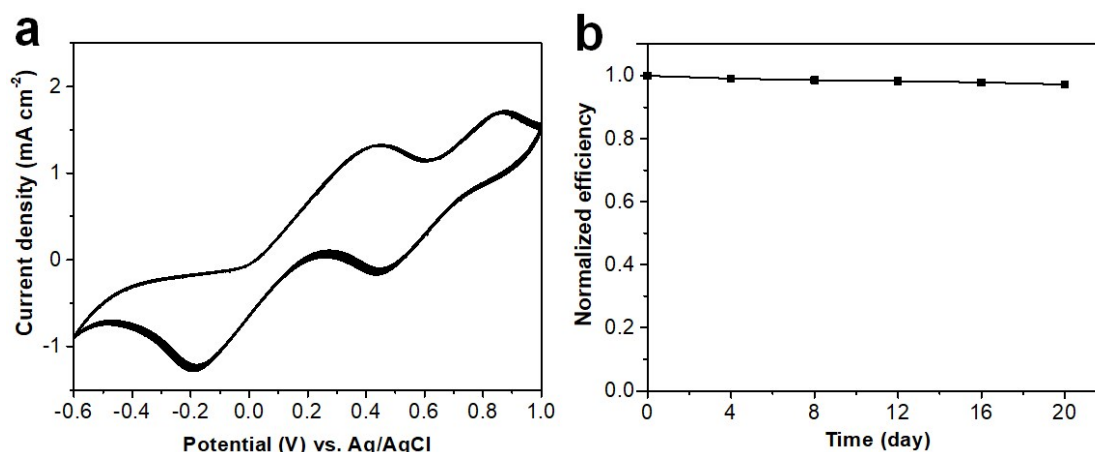

**Figure S3.** Stability test of TNRs@C@WS<sub>2</sub>: (a) 20 consecutive CV curves of TNRs@C@WS<sub>2</sub> for the iodide/triiodide redox couple in the electrolyte (scanning rate: 50 mV s<sup>-1</sup>). (b) TNRs@C@WS<sub>2</sub> based DSSCs tested for 20 days.
